# Supplementary material for: Microbial Surface Biofilm Responds to the Growth-Reproduction-Senescence Cycle of the Dominant Coral Reef Macroalgae Sargassum spp
Source: MDPI journal article supplement (doi:10.3390/life11111199), 2021-11-06
Supplement: s1 [file s1]

# Supplementary Materials: Microbial Surface Biofilm Responds to the Growth-Reproduction-Senescence Cycle of the Dominant Coral Reef Macroalgae *Sargassum* spp.

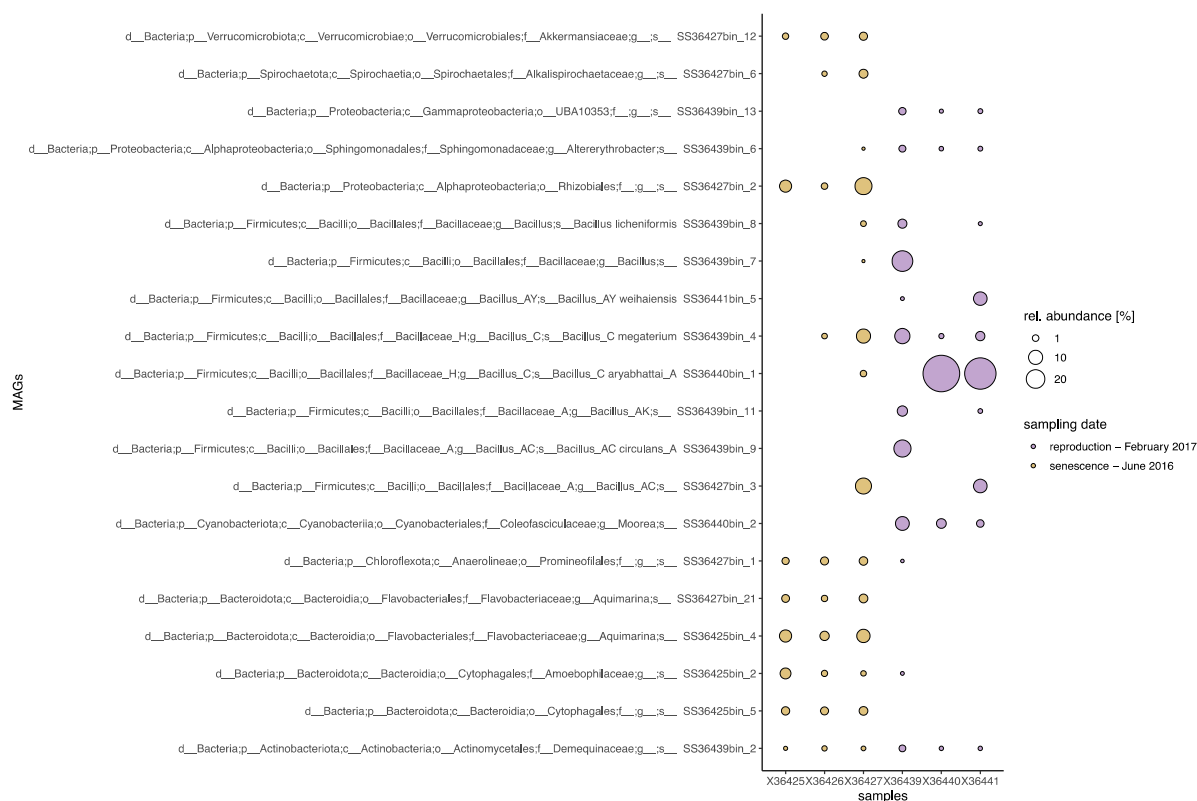

**Figure S1.** Relative abundances of previously reconstructed metagenome assembled genomes (MAGs) from the *Sargassum* spp. biofilm [51]. Adapter-trimmed metagenomic reads, originating from *Sargassum* spp. biofilm samples collected in June 2016 (‘senescence’ stage) and February 2017 (‘reproduction’ stage), were mapped against 20 high quality MAGs with coverM v0.2.0 (<https://github.com/wwood/CoverM>) using a 75% minimum alignment and 95% minimum identity threshold.

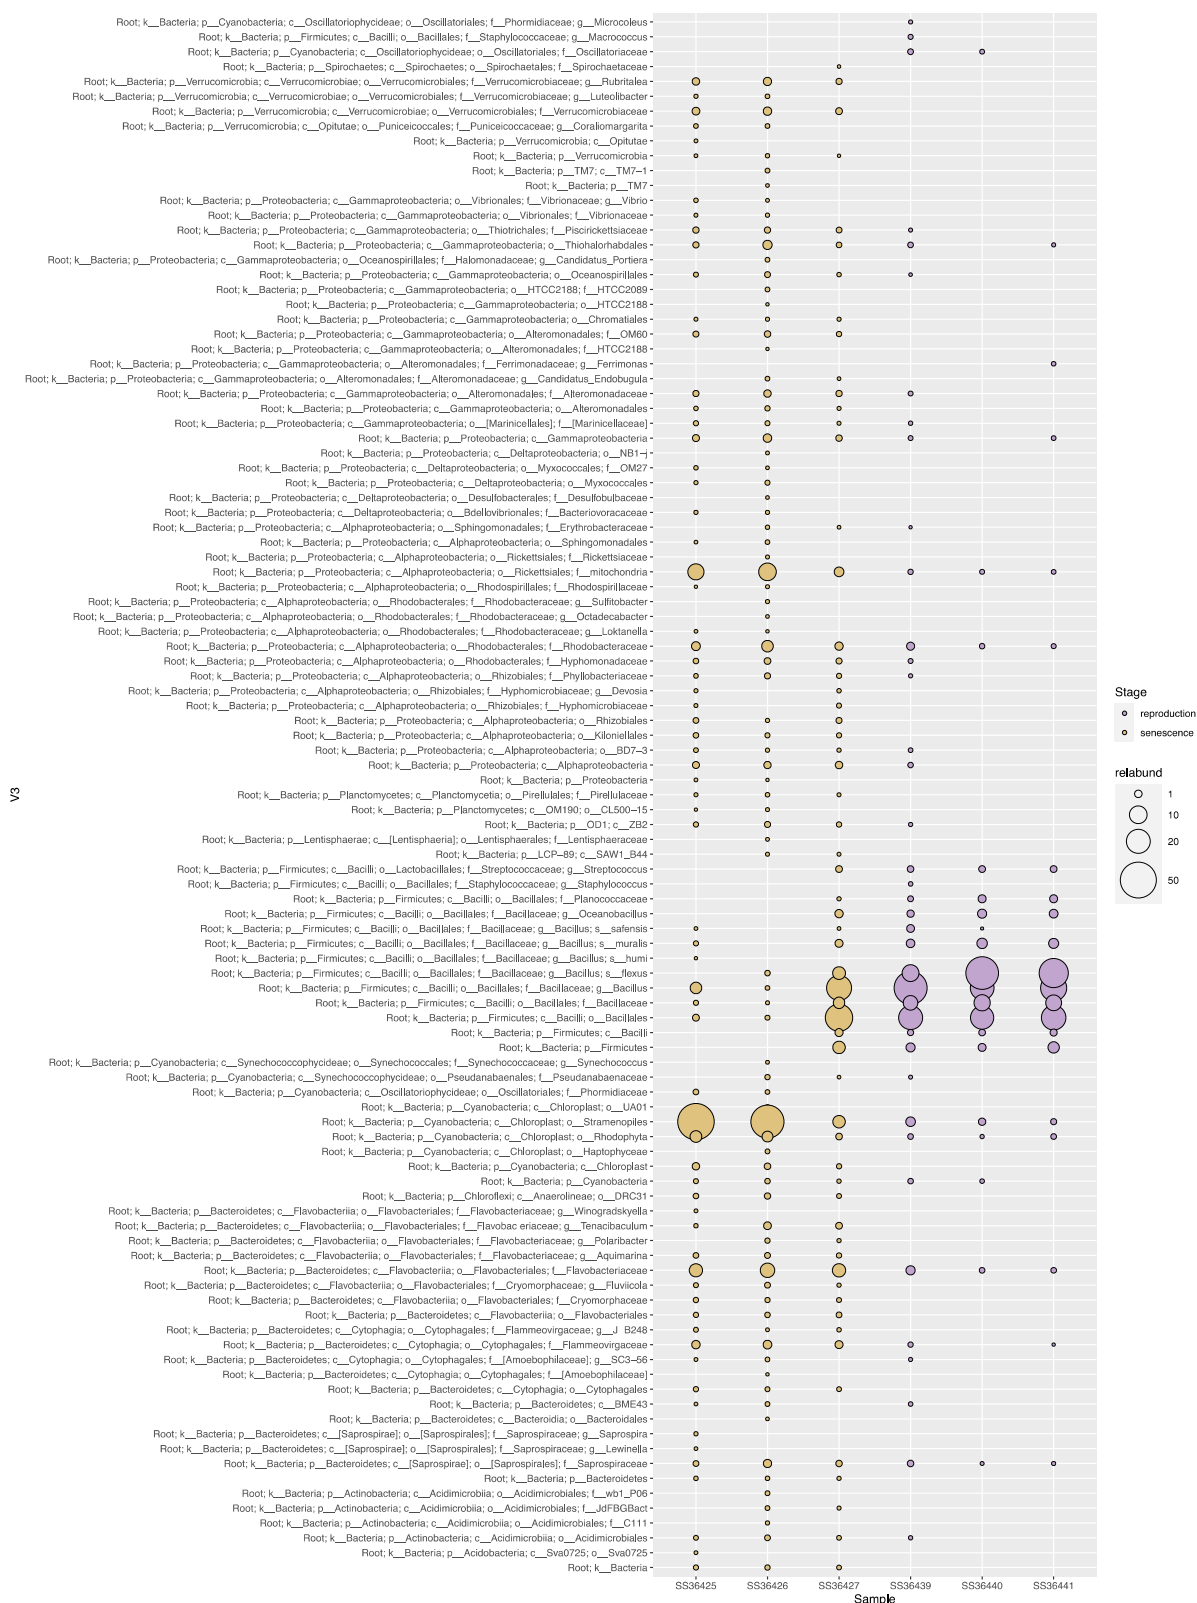

**Figure S2.** Overview of the microbial community profile confirms the representativeness of the retrieved metagenome assembled genomes (MAGs). The microbial community profiles were generated by extracting 16S rRNA gene fragments of adapter-trimmed metagenome reads using GraftM v0.12.0, (<https://github.com/geronimp/graftM>). The bubbleplot displays only the microbial taxa with a relative abundance >0.1%.

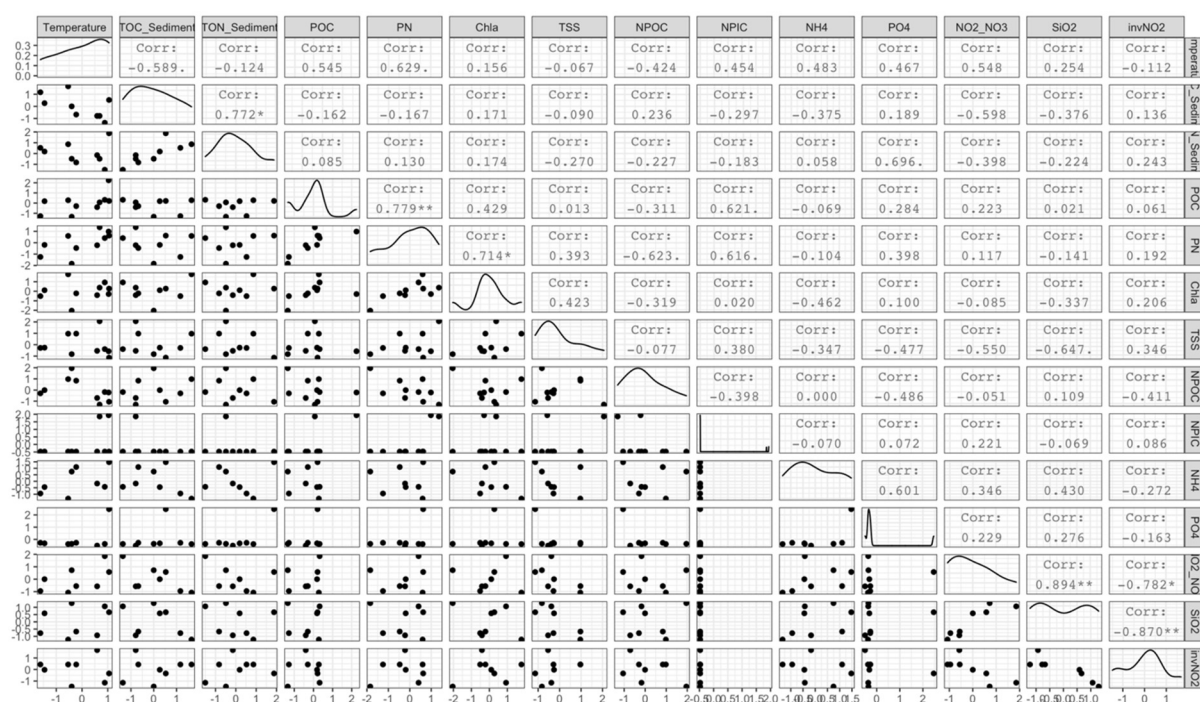

**Figure S3.** Correlation matrix for environmental parameters collected at Geoffrey Bay computed with Pearson correlation. Correlation threshold set to values equal to or above 0.7 or values equal to or below  $-0.7$ . Values meeting these criteria are marked with asterisks.

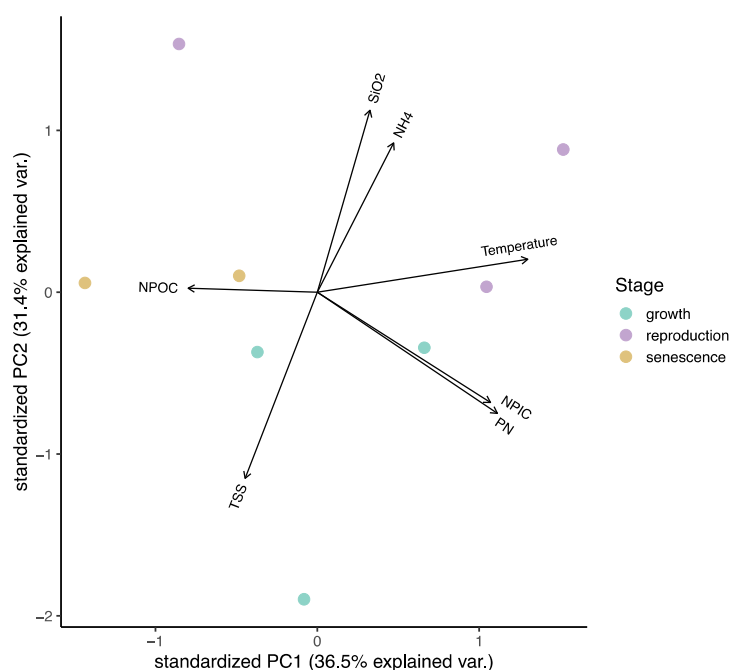

**Figure S4.** Principal Component Analysis (PCA) of environmental metadata displaying seawater parameters that significantly vary between sampling time points. Color indicates the growth-reproduction-senescence stage of the host. The selected seawater parameters include: NPOC = non-purgeable organic carbon, TSS = total suspended solids, PN = particulate nitrogen, NPIC = non-purgeable inorganic carbon, SiO<sub>2</sub> = Silica, NH<sub>4</sub> = ammonium concentration, and seawater temperature.

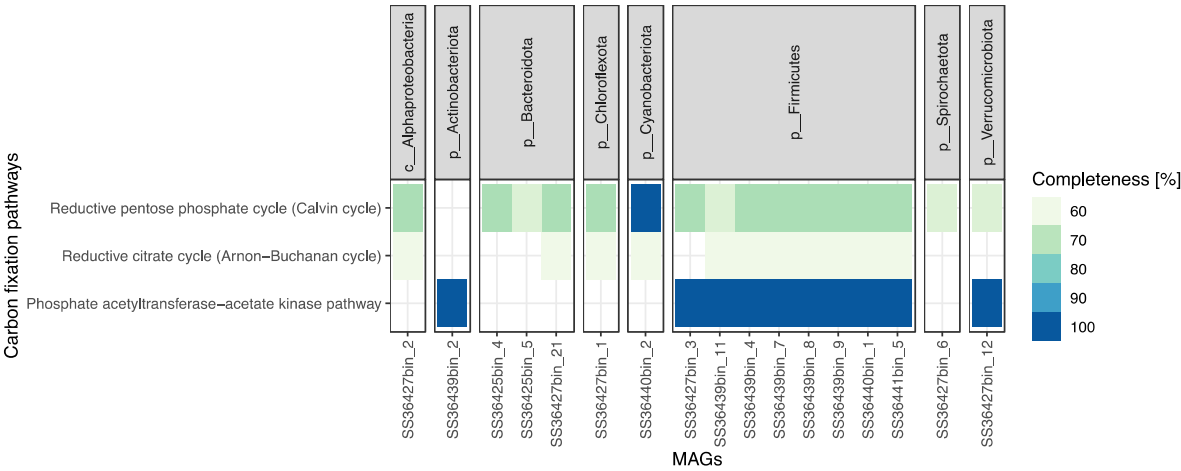

**Figure S5.** Carbon fixation pathways detected in recovered metagenome assembled genomes (MAGs). Colour indicates the completeness (in percent) of KEGG modules.

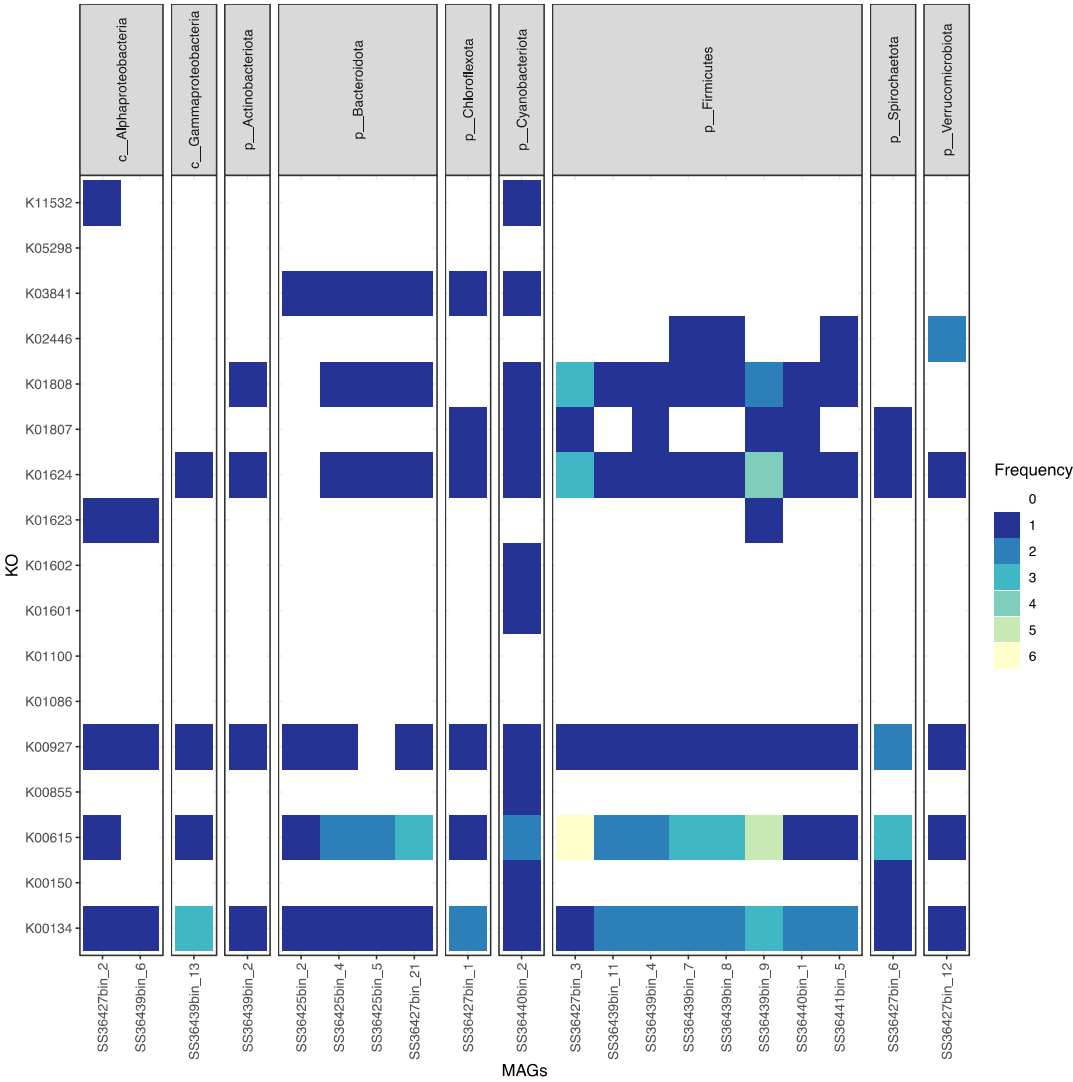

**Figure S6.** Copy number (frequency) of annotated KEGG KOs associated with autotrophic carbon fixation via the Calvin Cycle for recovered metagenome assembled genomes (MAGs).

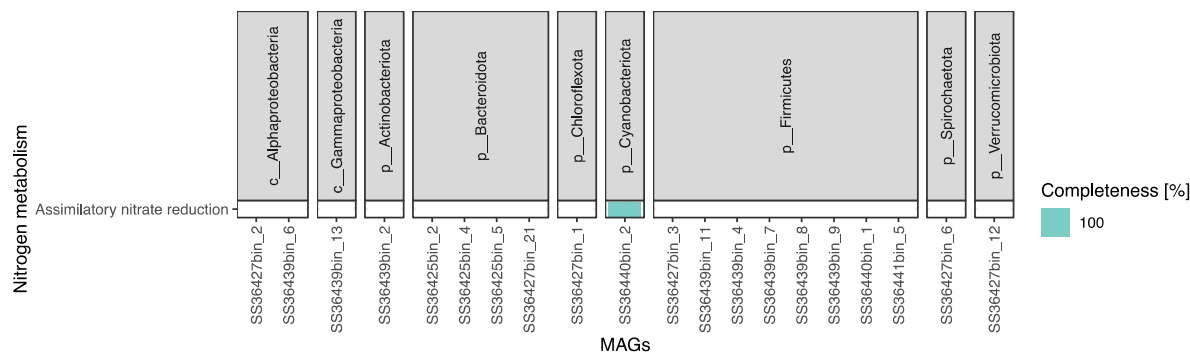

**Figure S7.** Nitrogen related KEGG modules detected in recovered metagenome assembled genomes (MAGs). Colour indicates the completeness (in percent) of KEGG modules.

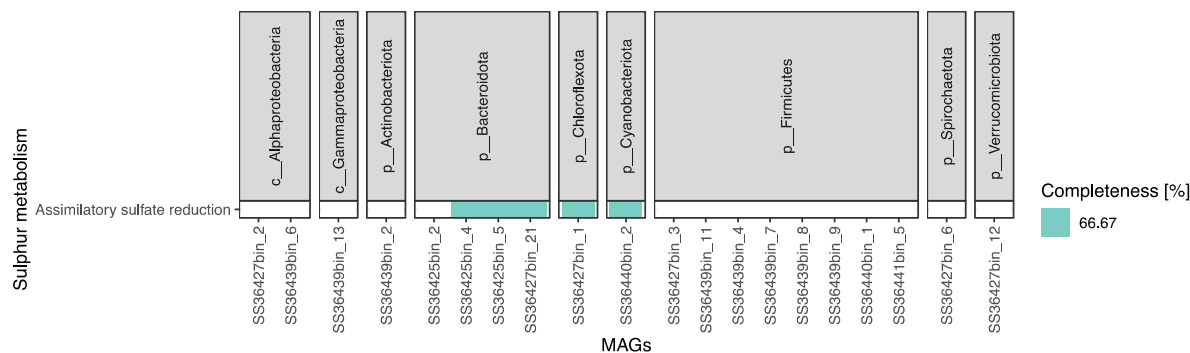

**Figure S8.** Sulphur related KEGG modules detected in recovered metagenome assembled genomes (MAGs). Colour indicates the completeness (in percent) of KEGG modules.

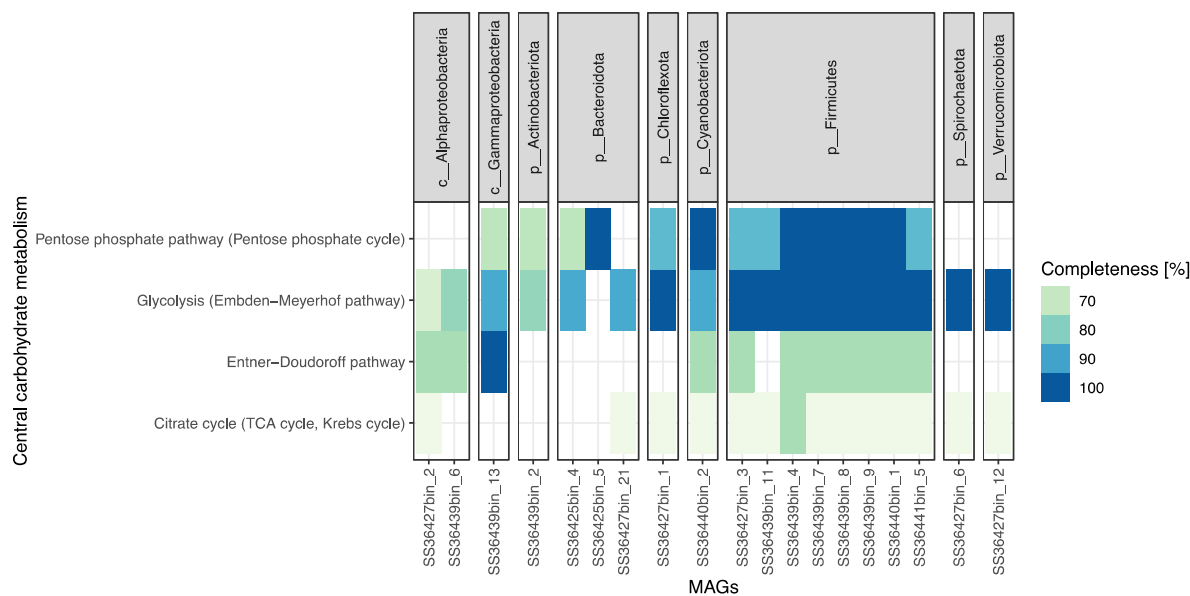

**Figure S9.** Central carbohydrate metabolism related KEGG modules detected in recovered metagenome assembled genomes (MAGs). Colour indicates the completeness (in percent) of KEGG modules.

**Table S1.** Permutational Analysis of Variance for abiotic factors of the distance-based Redundancy Analysis (db-RDA) significantly explaining observed compositional variations of the *Sargassum* spp. biofilm community.

| <i>Sargassum</i> sp. |          |    |        |        |          |
|----------------------|----------|----|--------|--------|----------|
| Variable             | R2.adj   | Df | AIC    | F      | Pf(<F)   |
| Temperature          | 0.02502  | 1  | 57.197 | 1.5917 | 0.002 ** |
| NH4                  | 0.041662 | 1  | 57.669 | 1.3806 | 0.006 ** |
| NPOC                 | 0.056169 | 1  | 58.132 | 1.3228 | 0.02 *   |
| TSS                  | 0.070895 | 1  | 58.524 | 1.317  | 0.024 *  |
| SiO2                 | 0.092072 | 1  | 58.673 | 1.4432 | 0.018 *  |

**Table S2.** Taxonomic affiliation, completeness, contamination and genome size of each individual metagenome assembled genome (MAG) retrieved from *Sargassum* spp. biofilm samples.

| MAG ID        | GTDB-tk Taxonomy                                                                                                        | Completeness<br>In % | Contamination<br>In % | Genome<br>Size (bp) |
|---------------|-------------------------------------------------------------------------------------------------------------------------|----------------------|-----------------------|---------------------|
| SS36425bin_2  | d__Bacteria;p__Bacteroidota;c__Bacteroidia;o__Cytophagales;f__Amoebophilaceae;g__UBA8403;s__                            | 79.4                 | 0.55                  | 1098163             |
| SS36425bin_4  | d__Bacteria;p__Bacteroidota;c__Bacteroidia;o__Flavobacteriales;f__Flavobacteriaceae;g__Aquimarina;s__                   | 82.71                | 9.78                  | 1865337             |
| SS36425bin_5  | d__Bacteria;p__Bacteroidota;c__Bacteroidia;o__Cytophagales;f__UBA9547;g__s__                                            | 75.95                | 3                     | 3635561             |
| SS36427bin_1  | d__Bacteria;p__Chloroflexota;c__Anaerolineae;o__Promineofilales;f__Promineofilaceae;g__s__                              | 98.18                | 3.64                  | 5809359             |
| SS36427bin_12 | d__Bacteria;p__Verrucomicrobiota;c__Verrucomicrobiae;o__Verrucomicrobiales;f__Akkermansiaceae;g__s__                    | 87.33                | 2.38                  | 2711003             |
| SS36427bin_2  | d__Bacteria;p__Proteobacteria;c__Alphaproteobacteria;o__Rhizobiales;f__s__g__s__                                        | 92                   | 0.2                   | 2305540             |
| SS36427bin_21 | d__Bacteria;p__Bacteroidota;c__Bacteroidia;o__Flavobacteriales;f__Flavobacteriaceae;g__Aquimarina;s__                   | 78.54                | 3.26                  | 2093196             |
| SS36427bin_3  | d__Bacteria;p__Firmicutes;c__Bacilli;o__Bacillales;f__Bacillaceae_A;g__Bacillus_AC;s__                                  | 92.78                | 0.86                  | 5236246             |
| SS36427bin_6  | d__Bacteria;p__Spirochaetota;c__Spirochaetia;o__Spirochaetales;f__Alkalispirochaetaceae;g__s__                          | 93.2                 | 0                     | 1422575             |
| SS36439bin_11 | d__Bacteria;p__Firmicutes;c__Bacilli;o__Bacillales;f__Bacillaceae_A;g__Bacillus_AK;s__                                  | 80.78                | 2.03                  | 2922325             |
| SS36439bin_13 | d__Bacteria;p__Proteobacteria;c__Gammaproteobacteria;o__UBA10353;f__UBA7415;g__UBA7415;s__                              | 87.79                | 10.98                 | 2595422             |
| SS36439bin_2  | d__Bacteria;p__Actinobacteriota;c__Actinobacteria;o__Actinomycetales;f__Demequinaceae;g__s__                            | 85.83                | 0                     | 1084055             |
| SS36439bin_4  | d__Bacteria;p__Firmicutes;c__Bacilli;o__Bacillales;f__Bacillaceae_H;g__Bacillus_C;s__Bacillus_C megaterium              | 99.43                | 0.03                  | 4845095             |
| SS36439bin_6  | d__Bacteria;p__Proteobacteria;c__Alphaproteobacteria;o__Sphingomonadales;f__Sphingomonadaceae;g__Altererythrobacter;s__ | 80.01                | 1.87                  | 2395843             |
| SS36439bin_7  | d__Bacteria;p__Firmicutes;c__Bacilli;o__Bacillales;f__Bacillaceae;g__Bacillus;s__                                       | 81.03                | 0                     | 3980272             |
| SS36439bin_8  | d__Bacteria;p__Firmicutes;c__Bacilli;o__Bacillales;f__Bacillaceae;g__Bacillus;s__Bacillus licheniformis                 | 97.8                 | 0                     | 4078403             |
| SS36439bin_9  | d__Bacteria;p__Firmicutes;c__Bacilli;o__Bacillales;f__Bacillaceae_A;g__Bacillus_AC;s__Bacillus_AC circulans_A           | 92.78                | 2.79                  | 5551538             |
| SS36440bin_1  | d__Bacteria;p__Firmicutes;c__Bacilli;o__Bacillales;f__Bacillaceae_H;g__Bacillus_C;s__Bacillus_C aryabhattai_A           | 99.43                | 0                     | 3974674             |
| SS36440bin_2  | d__Bacteria;p__Cyanobacteriota;c__Cyanobacteriia;o__Cyanobacteriales;f__Coleofasciculaceae;g__Moorea;s__                | 98.44                | 0.81                  | 7749996             |

---

|              |                                                                                                                 |       |      |         |
|--------------|-----------------------------------------------------------------------------------------------------------------|-------|------|---------|
| SS36441bin_5 | d__Bacteria;p__Firmicutes;c__Bacilli;o__Bacillales;f__Bacillaceae;g__Bacillus_AY;<br>s__Bacillus_AY weihaiensis | 98.97 | 2.35 | 4791764 |
|--------------|-----------------------------------------------------------------------------------------------------------------|-------|------|---------|

---
